# Supplementary material for: Low-Frequency rTMS over Contralesional M1 Increases Ipsilesional Cortical Excitability and Motor Function with Decreased Interhemispheric Asymmetry in Subacute Stroke: A Randomized Controlled Study
Source: Hindawi journal article supplement (doi:10.1155/2022/3815357), 2022-01-05
Supplement: f2 [file 3815357.f2.pdf]

## Supplementary II Figure 1\_Neuronavigation system and identification of hotspot

A)

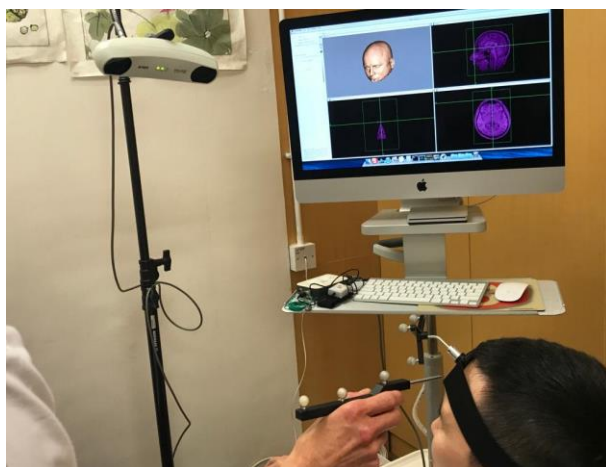

B)

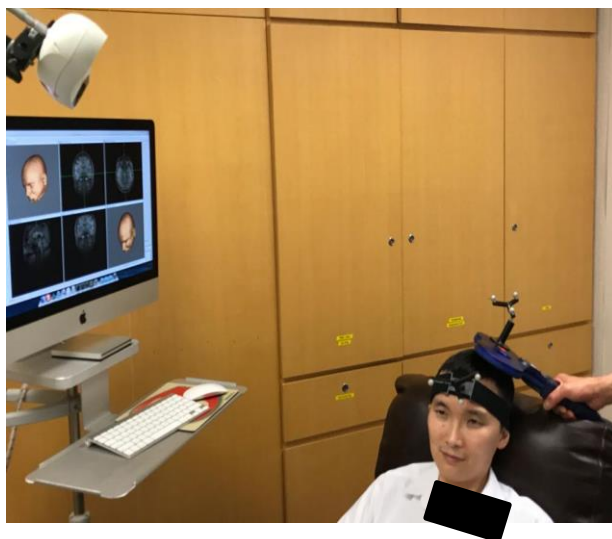

A) Skull model was recreated.

B) The hotspot was identified and marked using the neuronavigation system.
